# Supplementary material for: Tumor heterogeneity evaluated by computed tomography detects muscle-invasive upper tract urothelial carcinoma that is associated with inflammatory tumor microenvironment
Source: PubMed Central journal article supplement (PMC8271017; doi:10.1038/s41598-021-93414-2), 2021-07-09
Supplement: 41598_2021_93414_MOESM1_ESM.pdf [file 41598_2021_93414_MOESM1_ESM.pdf]

# Supplementary Information

## Tumor heterogeneity evaluated by computed tomography detects muscle-invasive upper tract urothelial carcinoma that is associated with inflammatory tumor microenvironment

Goto K, Honda Y, Ikeda K, Tekemoto K, Higaki T, Hayashi T, Kobatake K, Nakamura Y, Sekino Y, Inoue S, Awai K, Yasui W and Teishima J

### Supplementary figures

#### Figure S1

Scatter plots and survival curves according to parameters obtained from texture analysis.

#### Figure S2

xCell scores in 32 cases of UTUC.

#### Figure S3

Scatter plots according to parameters obtained from texture analysis

#### Figure S4

Survival curves according to the number of CD68-, CD163- and CD204- positive macrophages

#### Figure S5

mRNA expressions in 32 cases of UTUC.

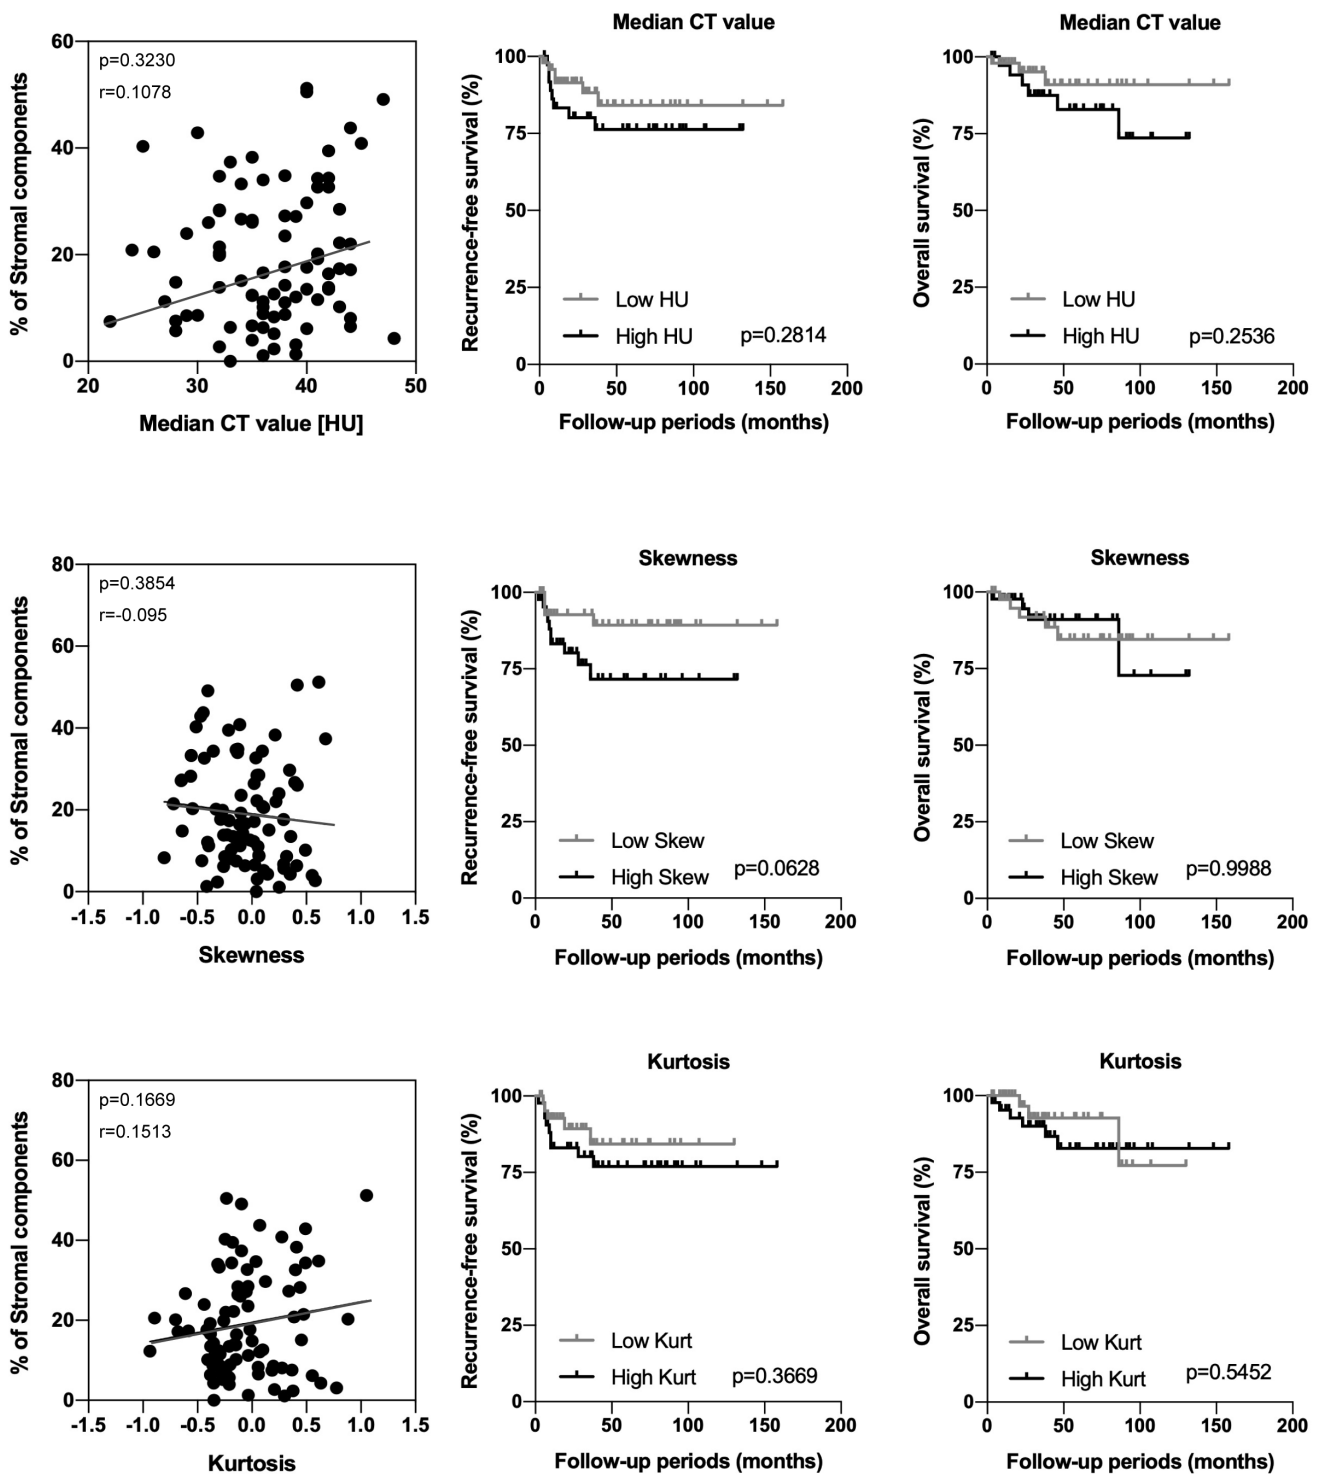

Figure S1

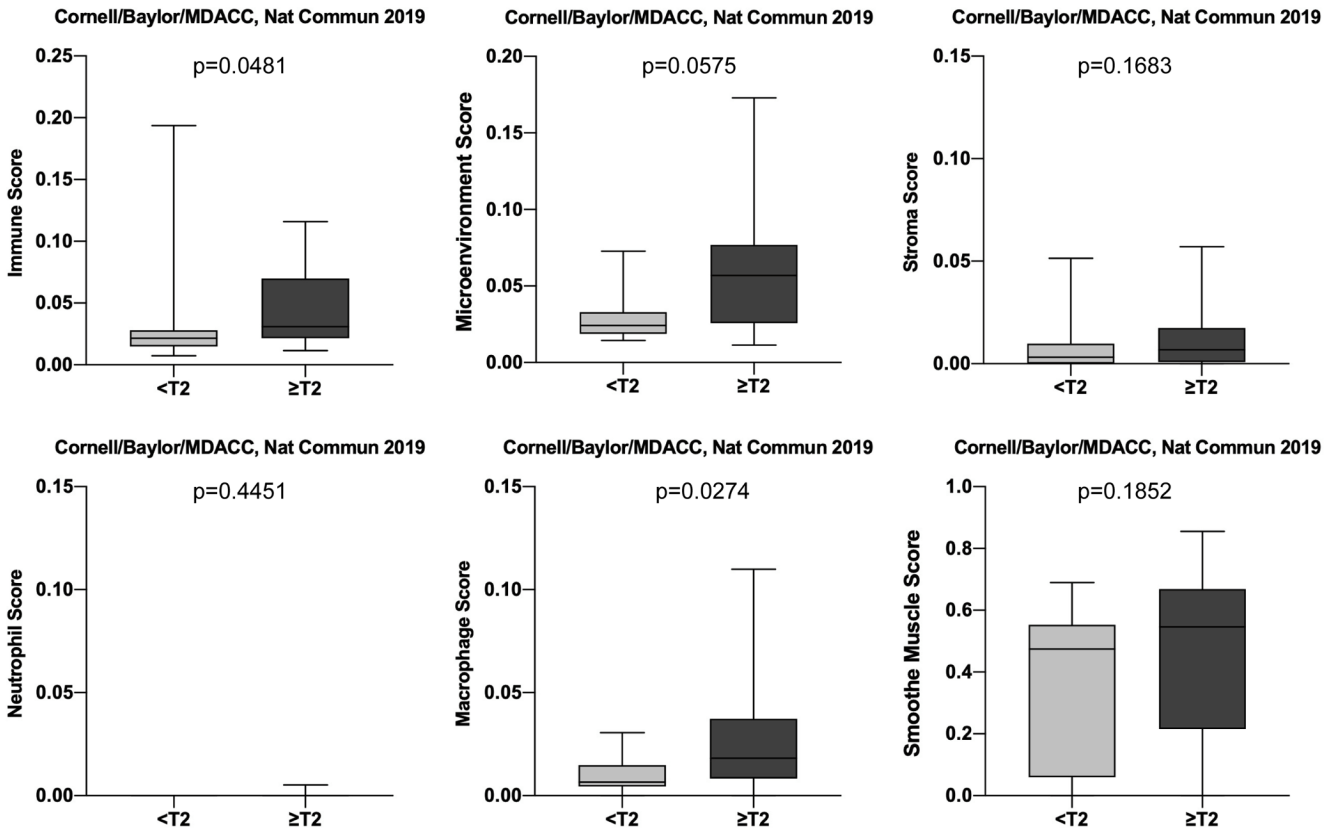

Figure S2

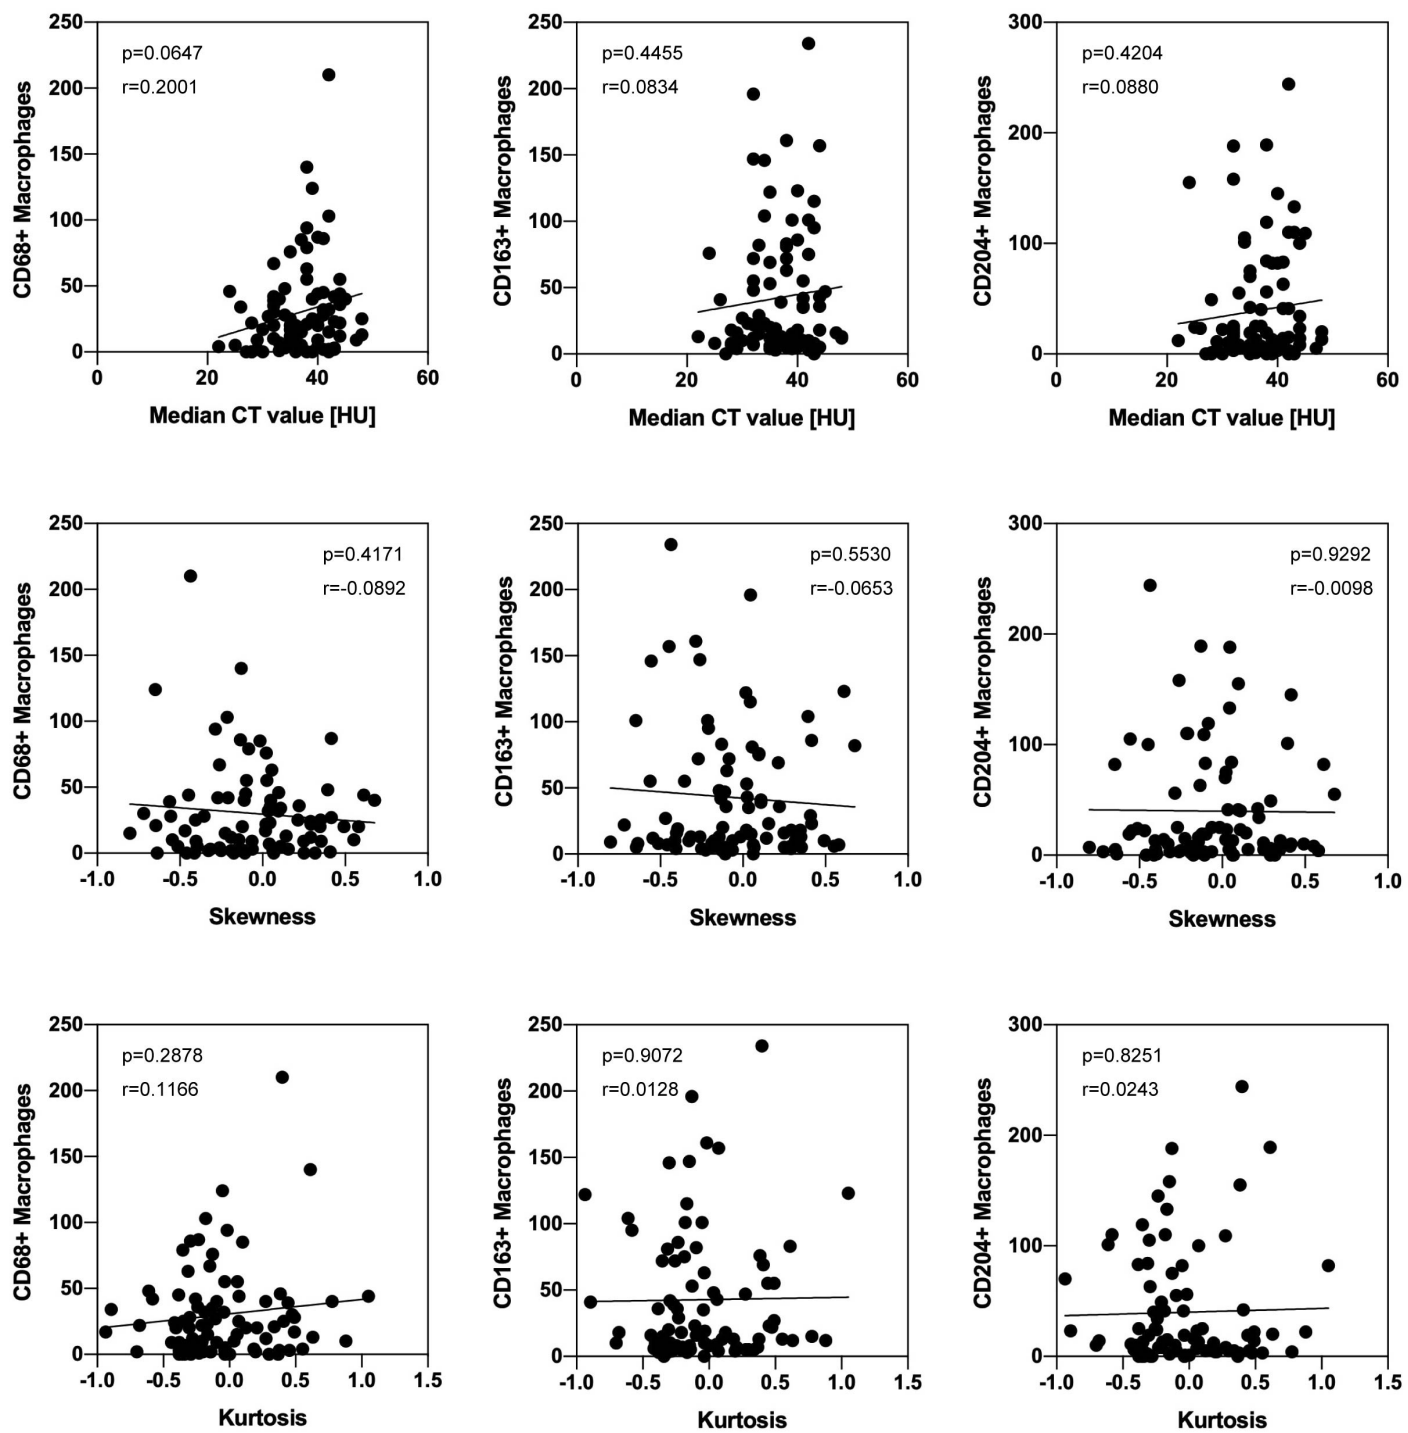

Figure S3

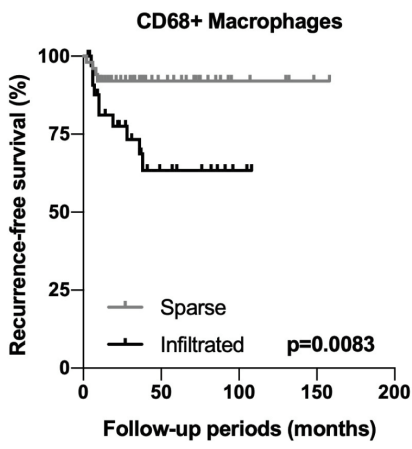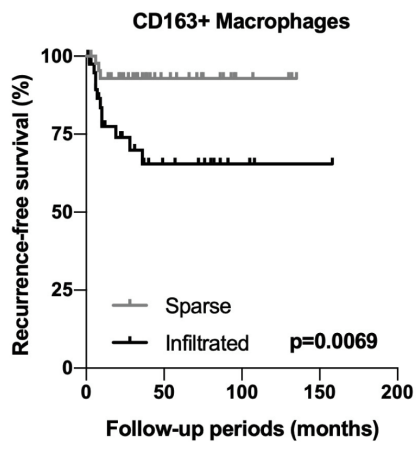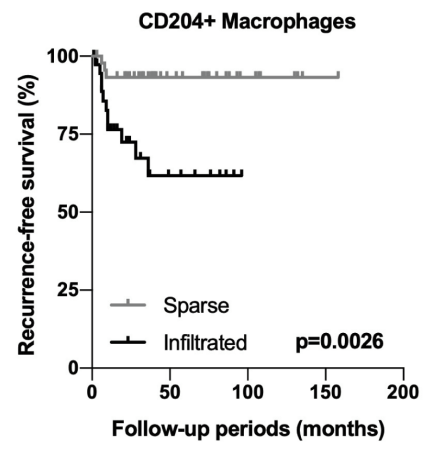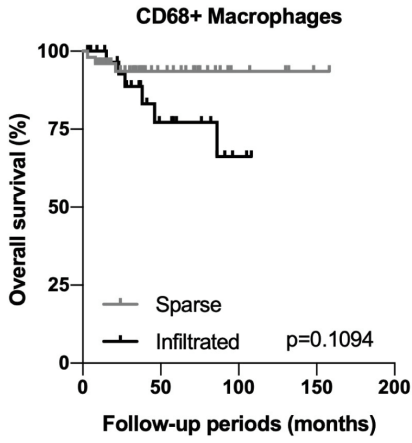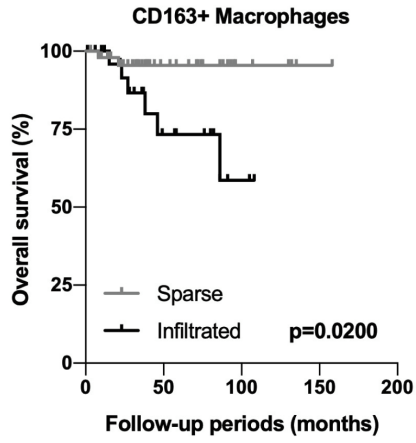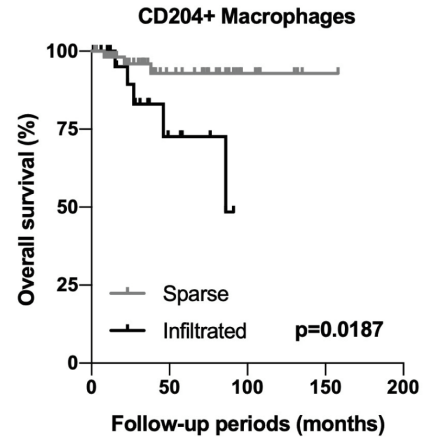

Figure S4

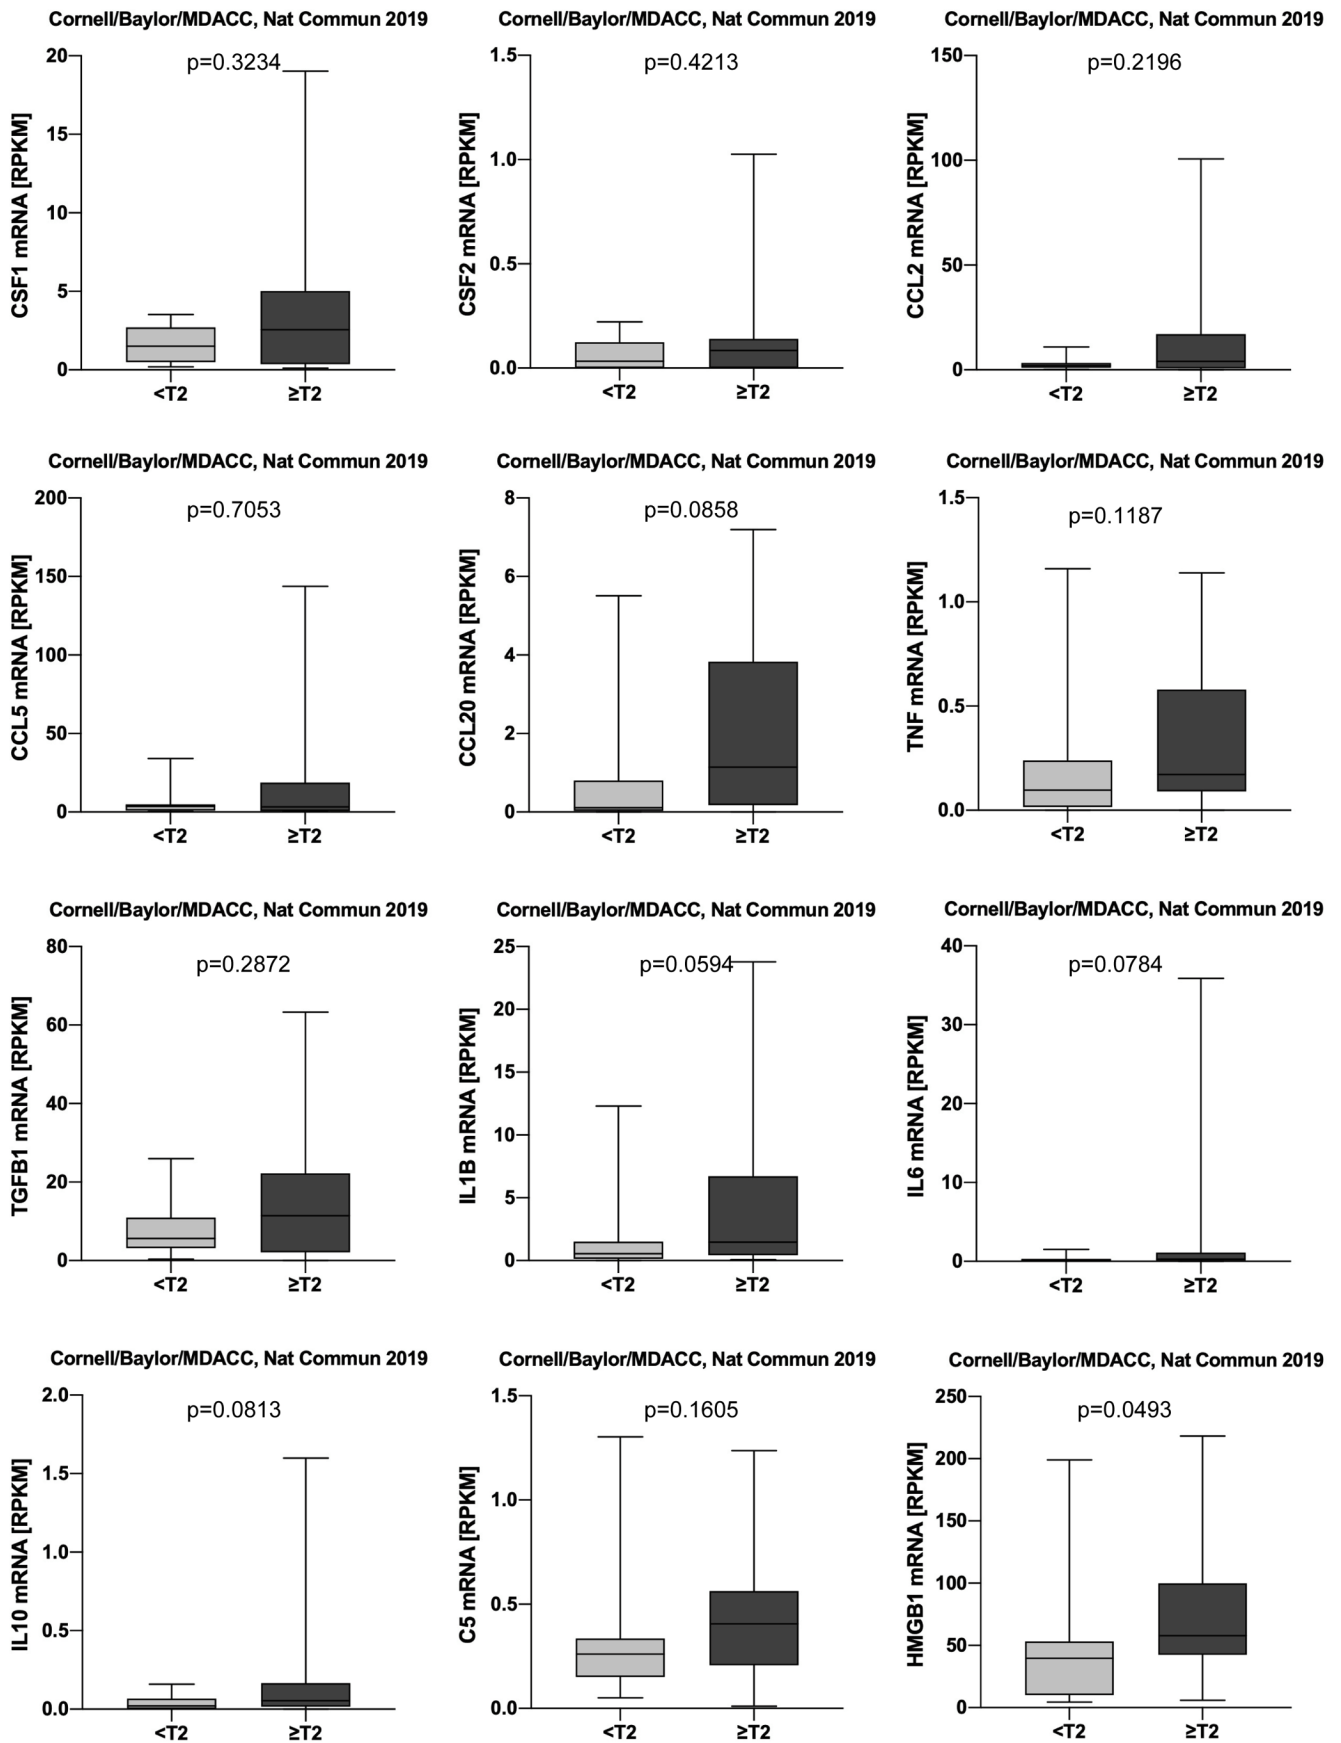

Figure S5

# Supplementary figure legends

## **Figure S1**

Scatter plots comparing CT attenuation number, skewness and kurtosis and the amount of stromal components and Kaplan-Meier analysis according to CT attenuation number, skewness and kurtosis.

## **Figure S2**

Estimations of xCell score in 32 cases of UTUC (Cornell/Baylor/MDACC, Nat Commun 2019). Immune score, microenvironment score, stroma score, neutrophil score, macrophage score and smooth muscle score were compared.

## **Figure S3**

Relationships between CT attenuation number, skewness and kurtosis and the number of CD68-, CD163- and CD204- positive macrophages. Correlations were evaluated using Pearson correlation coefficients.

## **Figure S4**

Kaplan-Meier analysis according to the number of infiltrating CD68-, CD163- and CD204- positive macrophages. Recurrence-free survival and overall survival were examined.

## **Figure S5**

mRNA expressions in 32 cases of UTUC (Cornell/Baylor/MDACC, Nat Commun 2019). Datasets were obtained from cBioportal. org (<https://www.cbioportal.org>). Genes involved in macrophage recruitment were analyzed.

**Table S1.**

Relationships between clinicopathological parameters and CD68-, CD163- and CD204-positive macrophages

|                         | CD68+<br>macrophage | p-value           | CD163+<br>macrophage | p-value           | CD204+<br>macrophage | p-value           |
|-------------------------|---------------------|-------------------|----------------------|-------------------|----------------------|-------------------|
| Hydronephrosis          |                     |                   |                      |                   |                      |                   |
| Mild                    | 27.15 ± 31.21       | 0.3475            | 34.48 ± 38.24        | 0.0680            | 32.83 ± 46.22        | 0.1234            |
| Severe                  | 36.03 ± 43.71       |                   | 59.78 ± 64.81        |                   | 53.93 ± 62.22        |                   |
| Urine cytology          |                     |                   |                      |                   |                      |                   |
| Negative                | 20.13 ± 21.67       | <b>0.0127</b>     | 20.33 ± 32.63        | <b>0.0009</b>     | 20.33 ± 32.63        | <b>0.0009</b>     |
| Positive                | 38.49 ± 42.72       |                   | 56.09 ± 60.35        |                   | 56.09 ± 60.35        |                   |
| T stage                 |                     |                   |                      |                   |                      |                   |
| Ta-T1                   | 15.36 ± 18.08       | <b>&lt;0.0001</b> | 18.27 ± 20.49        | <b>&lt;0.0001</b> | 12.24 ± 16.66        | <b>&lt;0.0001</b> |
| T2-T4                   | 49.24 ± 43.38       |                   | 74.41 ± 57.56        |                   | 75.49 ± 61.27        |                   |
| Histological grade      |                     |                   |                      |                   |                      |                   |
| Low                     | 14.21 ± 19.03       | <b>0.0003</b>     | 13.45 ± 16.04        | <b>&lt;0.0001</b> | 8.72 ± 10.59         | <b>&lt;0.0001</b> |
| High                    | 37.95 ± 39.34       |                   | 57.16 ± 53.78        |                   | 55.09 ± 57.99        |                   |
| Lymphovascular invasion |                     |                   |                      |                   |                      |                   |
| Not evident             | 23.24 ± 30.88       | <b>0.0208</b>     | 29.38 ± 34.68        | <b>0.0030</b>     | 29.22 ± 43.71        | <b>0.0193</b>     |
| Evident                 | 44.59 ± 41.08       |                   | 70.93 ± 63.29        |                   | 61.81 ± 62.72        |                   |
| Concomitant CIS         |                     |                   |                      |                   |                      |                   |
| No                      | 22.63 ± 24.96       | <b>0.0200</b>     | 33.14 ± 42.36        | <b>0.0135</b>     | 32.44 ± 45.78        | <b>0.0414</b>     |
| Yes                     | 49.96 ± 50.65       |                   | 67.83 ± 58.13        |                   | 58.65 ± 64.40        |                   |

CIS= carcinoma in situ



**Table S2.**

Relationships between tumor heterogeneity evaluated by TA and CD68-, CD163- and CD204-positive macrophages according to each indicated pathological parameter

|                   | Ta-T1 cases        |               |               | T2-T4 cases        |               |         |
|-------------------|--------------------|---------------|---------------|--------------------|---------------|---------|
|                   | Standard deviation |               |               | Standard deviation |               |         |
|                   | Low                | High          | p-value       | Low                | High          | p-value |
| CD68+ macrophage  | 10.61 ± 11.41      | 23.56 ± 24.11 | <b>0.0437</b> | 43.75 ± 32.60      | 51.88 ± 48.10 | 0.5502  |
| CD163+ macrophage | 13.71 ± 12.07      | 26.11 ± 28.72 | <b>0.0480</b> | 71.83 ± 65.88      | 75.64 ± 54.55 | 0.8641  |
| CD204+ macrophage | 9.39 ± 11.53       | 17.17 ± 22.56 | 0.0932        | 71.25 ± 61.27      | 77.52 ± 62.43 | 0.7748  |

|                   | Low grade          |               |         | High grade         |               |               |
|-------------------|--------------------|---------------|---------|--------------------|---------------|---------------|
|                   | Standard deviation |               |         | Standard deviation |               |               |
|                   | Low                | High          | p-value | Low                | High          | p-value       |
| CD68+ macrophage  | 7.89 ± 8.01        | 24.55 ± 26.76 | 0.0347  | 28.48 ± 28.56      | 45.34 ± 45.12 | <b>0.0457</b> |
| CD163+ macrophage | 9.61 ± 6.43        | 19.73 ± 24.09 | 0.1002  | 44.56 ± 53.17      | 67.00 ± 52.98 | 0.0597        |
| CD204+ macrophage | 7.56 ± 11.47       | 10.64 ± 9.15  | 0.2163  | 40.40 ± 51.98      | 66.56 ± 60.61 | <b>0.0427</b> |

|                   | LVI not evident    |               |               | LVI evident        |               |         |
|-------------------|--------------------|---------------|---------------|--------------------|---------------|---------|
|                   | Standard deviation |               |               | Standard deviation |               |         |
|                   | Low                | High          | p-value       | Low                | High          | p-value |
| CD68+ macrophage  | 15.80 ± 20.54      | 34.08 ± 39.68 | <b>0.0231</b> | 37.63 ± 33.05      | 47.53 ± 44.52 | 0.5316  |
| CD163+ macrophage | 18.89 ± 20.59      | 44.67 ± 44.65 | <b>0.0065</b> | 78.25 ± 79.26      | 67.84 ± 57.53 | 0.7476  |
| CD204+ macrophage | 17.28 ± 28.27      | 46.63 ± 55.79 | <b>0.0119</b> | 67.63 ± 70.62      | 59.37 ± 61.00 | 0.7781  |

|                   | CIS not evident    |               |         | CIS evident        |               |         |
|-------------------|--------------------|---------------|---------|--------------------|---------------|---------|
|                   | Standard deviation |               |         | Standard deviation |               |         |
|                   | Low                | High          | p-value | Low                | High          | p-value |
| CD68+ macrophage  | 18.08 ± 23.08      | 28.32 ± 26.44 | 0.1122  | 27.63 ± 30.22      | 61.87 ± 56.01 | 0.0707  |
| CD163+ macrophage | 25.74 ± 41.02      | 42.39 ± 42.92 | 0.1242  | 48.25 ± 54.57      | 78.27 ± 59.04 | 0.2405  |
| CD204+ macrophage | 26.31 ± 44.91      | 40.11 ± 46.52 | 0.2400  | 28.13 ± 37.41      | 74.93 ± 70.72 | 0.0504  |

LVI = Lymphovascular invasion, CIS= carcinoma in situ

**Table S3.**

Relationships between HMGB1 expression and parameters obtained from texture analysis

|                         | HMGB1 IHC      |                | p-value       |
|-------------------------|----------------|----------------|---------------|
|                         | Weak           | Strong         |               |
| Median CT value [HU]    | 36.38 ± 5.72   | 37.32 ± 5.43   | 0.4580        |
| Standard deviation (SD) | 11.02 ± 3.57   | 13.80 ± 3.78   | <b>0.0011</b> |
| Skewness                | -0.073 ± 0.335 | -0.040 ± 0.334 | 0.6636        |
| Kurtosis                | -0.054 ± 0.348 | -0.042 ± 0.440 | 0.8933        |

HMGB1=high mobility group box 1, IHC=immunohistochemistry, CT=computed tomography, HU=Hounsfield Unit.
